# Supplementary material for: Synthesis of unconventional Pd–Se nanoparticles for phase-dependent ethanol electrooxidation
Source: Royal Society of Chemistry journal article supplement (doi:10.1039/d2cc06785d), 2023-01-01
Supplement: d2cc06785d1.pdf [file d2cc06785d1.pdf]

## Electronic Supplementary Information

### **Synthesis of unconventional Pd-Se nanoparticles for phase-dependent ethanol electrooxidation**

Zhenya Hu,<sup>ab</sup> Niuwa Yang,<sup>ab</sup> Yongjun Feng,<sup>c</sup> Lin Xu,<sup>d</sup> Chaoquan Hu,<sup>ae</sup> Hui Liu,<sup>\*ae</sup> Shaonan Tian,<sup>\*a</sup> Jun Yang<sup>\*abe</sup>

*<sup>a</sup>State Key Laboratory of Multiphase Complex Systems, Institute of Process Engineering, Chinese Academy of Sciences, Beijing 100190, China. Email: [liuhui@ipe.ac.cn](mailto:liuhui@ipe.ac.cn) (H.L.); [sntian@ipe.ac.cn](mailto:sntian@ipe.ac.cn) (S.T.); [jyang@ipe.ac.cn](mailto:jyang@ipe.ac.cn) (J.Y.)*

*<sup>b</sup>Center of Materials Science and Optoelectronics Engineering, University of Chinese Academy of Sciences, Beijing 100049, China*

*<sup>c</sup>State Key Laboratory of Chemical Resource Engineering, Beijing Engineering Center for Hierarchical Catalysts, College of Chemistry, Beijing University of Chemical Technology, No. 15 Beisanhuan East Road, Beijing 100029, China*

*<sup>d</sup>School of Chemistry and Materials Science, Jiangsu Key Laboratory of New Power Batteries, Jiangsu Collaborative Innovation Centre of Biomedical Functional Materials, Nanjing Normal University, Nanjing 210023, P. R. China*

*<sup>e</sup>Nanjing IPE Institute of Green Manufacturing Industry, Nanjing 211100, Jiangsu, China*

## Experimental

### Materials

Pd(acac)<sub>2</sub> (99.5%), oleylamine (OLA, 95%), NaBH<sub>4</sub> (98%) were purchased from Sigma-Aldrich and used as received. Se powder (99.7%) was obtained from Fuchen (Tianjin) Chemical Reagent Co., Ltd. Ethanol (99.7%), n-hexane (>99.5%) were bought from Sinopharm Chemical Reagent Co., Ltd. Nafion solution (5% in a mixture of lower aliphatic alcohols and water) from Sigma-Aldrich, Vulcan XC-72 carbon powder (BET specific surface area is 250m<sup>2</sup> g<sup>-1</sup>, and the average particle size is 40 ~ 50 nm) from Cabot, and commercial Pd/C catalyst (20 wt% of Pd, and ca. 3 nm Pd nanoparticles supported on Vulcan XC-72 carbon) from Johnson Matthey, were used as received. All glassware and magnets were cleaned with aqua regia, followed by copious rinsing with deionized water before drying in an oven.

### Methods

#### Synthesis of PdSe<sub>2</sub>, Pd<sub>17</sub>Se<sub>15</sub> and Pd<sub>7</sub>Se<sub>2</sub> nanoparticles

In a typical preparation of Pd-Se NPs with the PdSe<sub>2</sub> phase, 15.3 mg of Pd(acac)<sub>2</sub> (0.05 mmol) was dissolved in 5 ml of OLA. The Se solution was prepared by dissolving 10 mg of Se powder (0.125 mmol) and 10 mg of NaBH<sub>4</sub> (0.25 mmol) in 5 mL of OLA. The Se precursor was injected quickly into the Pd-containing reaction mixture, and then heated to 120°C and maintained there for 40 min under N<sub>2</sub> flow. Subsequently, the reaction system was heated to 200°C for another 30 min and cooled down to room temperature naturally afterwards. The synthesis of Pd-Se NPs with the Pd<sub>17</sub>Se<sub>15</sub> phase was achieved by using similar procedure but changing the amount of Se and NaBH<sub>4</sub> to 5.0 mg and 5.0 mg, while the Pd-Se NPs with the Pd<sub>7</sub>Se<sub>2</sub> phase were obtained by changing the amount of Se and NaBH<sub>4</sub> to 1.5 mg and 1.5 mg, respectively. The products were collected by centrifugation and washed with ethanol/n-hexane three times before final dispersion in 10 mL of n-hexane.

### Characterization

The transmission electron microscopy (TEM) and high-resolution TEM (HRTEM) were performed at a JEOL JEM-2010F electron microscope, and an energy dispersive X-ray spectroscopy (EDX) analyzer attached to the TEM was used to detect the relevant elements in the as-prepared samples. Powder X-ray diffraction (XRD) patterns were recorded on a SmartLab (9KW) using Cu K $\alpha$  radiation ( $\lambda=0.154056$  nm), while X-ray photoelectron spectroscopy (XPS) was conducted on a VG ESCALAB MKII spectrometer for characterizing the chemical states of the relevant elements.

### Electrochemical measurements

For the electrochemical measurements, all relevant samples were loaded on the XC-72 carbon substrate. The calculated amounts of carbon powder were added to the n-

hexane solution of the as-prepared samples. After stirring for 6 h, the carbon supported samples were collected by centrifugation and dried at room temperature in a vacuum. The accurate contents of the Pd loaded on carbon substrates were determined by ICP-AES.

Electrochemical measurements were conducted on a standard three-electrode cell that was connected to a Bio-logic VMP3 potentiostat. A leak-free Ag/AgCl electrode and a platinum mesh ( $1 \times 1 \text{ cm}^2$ ) attached to a platinum wire were used as the reference and counter electrode, respectively. All potentials were converted to values with reference to RHE. The catalyst inks were prepared as following: 5 mg of the above catalysts were dispersed ultrasonically into a mixed solution containing 0.8 mL of ethanol, 0.15 mL of water and 0.05 mL of Nafion solution. Then, 5  $\mu\text{L}$  of the ink was dropped onto the glassy carbon electrode with a diameter of 5 mm (electrode area was  $0.196 \text{ cm}^2$ ), followed by drying in a stream of warm air at  $70 \text{ }^\circ\text{C}$ . And the electrode was connected to a three-electrode test system to measure the electrochemical properties.

Electrochemically active surface areas (ECSAs) of these Pd-based nanoparticles were determined from CVs in the area of PdO reduction peaks with a scan of  $50 \text{ mV s}^{-1}$ , and were calculated using an equation in term of  $\text{ECSA} = Q/0.405G$ , where  $Q$  is the charge by integrated the reduction peak area of PdO to Pd (mC),  $G$  represents the mass loading of Pd on the electrode determined by ICP-AES, and 0.405 is the theoretical charge ( $\text{mC cm}^{-2}$ ) for the reduction of Pd. For CO stripping tests, the work electrode was immersed in 1 M KOH solution. Then, CO was purged in the solution for 30min to achieve the maximum coverage of CO. The modified electrode was quickly moved to a fresh  $\text{N}_2$  saturated 1 M KOH solution, and the CO stripping voltammogram was recorded between  $-1$ – $0.2 \text{ V}$  versus Ag/AgCl was scanned at a rate of  $50 \text{ mV s}^{-1}$ .

The catalytic performance of the  $\text{PdSe}_2$ ,  $\text{Pd}_{17}\text{Se}_{15}$ ,  $\text{Pd}_7\text{Se}_2$ , and commercial Pd/C catalyst for the ethanol oxidation was measured at room temperature by cyclic voltammetry (CV) and chronoamperometry (CA). For these measurements, the potential window of  $-1$ – $0.2 \text{ V}$  versus Ag/AgCl was scanned at a rate of  $50 \text{ mV s}^{-1}$ . The electrolyte was 1 M KOH containing 1 M ethanol.

**Table S1.** The structural parameters of the as-prepared Pd-Se NPs by wet-chemistry method.

| Chemical formula     | PdSe <sub>2</sub>                                                                                         | Pd <sub>17</sub> Se <sub>15</sub>                                                          | Pd <sub>7</sub> Se <sub>2</sub>                                                                                          |
|----------------------|-----------------------------------------------------------------------------------------------------------|--------------------------------------------------------------------------------------------|--------------------------------------------------------------------------------------------------------------------------|
| Crystal system       | orthorhombic                                                                                              | cubic                                                                                      | monoclinic                                                                                                               |
| Space group          | Pbca(61)                                                                                                  | Pm-3m (221)                                                                                | P21/c(14)                                                                                                                |
| Unit cell parameters | a = 5.7 Å, b = 5.8 Å,<br>c = 7.7 Å,<br>$\alpha = \beta = \gamma = 90^\circ$ , V =<br>257.8 Å <sup>3</sup> | a = b = c = 10.6 Å,<br>$\alpha = \beta = \gamma = 90^\circ$ , V =<br>1185.6 Å <sup>3</sup> | a = 9.5 Å, b = 5.4 Å,<br>c = 5.5 Å,<br>$\alpha = \gamma = 90^\circ$ , $\beta = 86.5^\circ$ ,<br>V = 278.2 Å <sup>3</sup> |
| Z                    | 4                                                                                                         | 2                                                                                          | 2                                                                                                                        |

**Table S2.** The ECSAs of PdSe<sub>2</sub>, Pd<sub>17</sub>Se<sub>15</sub>, Pd<sub>7</sub>Se<sub>2</sub> NPs and commercial Pd/C catalyst, and their corresponding Pd content determined by ICP-AES.

| Catalyst                          | ECSA (m <sup>2</sup> g <sup>-1</sup> ) | The content of Pd in the catalyst (%) |
|-----------------------------------|----------------------------------------|---------------------------------------|
| PdSe <sub>2</sub>                 | 18.7                                   | 7.4                                   |
| Pd <sub>17</sub> Se <sub>15</sub> | 30.4                                   | 11.3                                  |
| Pd <sub>7</sub> Se <sub>2</sub>   | 29.2                                   | 10.6                                  |
| Pd/C                              | 35.6                                   | 18.0                                  |

**Table S3.** Electrochemical measurements of ethanol oxidation on PdSe<sub>2</sub>, Pd<sub>17</sub>Se<sub>15</sub>, Pd<sub>7</sub>Se<sub>2</sub> NPs and commercial Pd/C catalyst.

| Catalyst                          | FPP (V) | I <sub>f</sub> (mA cm <sup>-2</sup><br>and A mg <sup>-1</sup> ) | BPP (V) | I <sub>b</sub> (mA cm <sup>-2</sup><br>and A mg <sup>-1</sup> ) | I <sub>f</sub> /I <sub>b</sub><br>(mass current density) |
|-----------------------------------|---------|-----------------------------------------------------------------|---------|-----------------------------------------------------------------|----------------------------------------------------------|
| PdSe <sub>2</sub>                 | 0.88    | 29.4/7.2                                                        | 0.73    | 26.8/6.6                                                        | 1.10                                                     |
| Pd <sub>17</sub> Se <sub>15</sub> | 0.86    | 17.1/5.2                                                        | 0.74    | 16.3/5.0                                                        | 1.04                                                     |
| Pd <sub>7</sub> Se <sub>2</sub>   | 0.84    | 15.4/4.8                                                        | 0.73    | 16.2/4.9                                                        | 0.98                                                     |
| Pd/C                              | 0.88    | 3.3/1.1                                                         | 0.75    | 4.3/1.5                                                         | 0.73                                                     |

FPP: Forward peak potential; I<sub>f</sub>: Forward peak current density; BPP: Backward peak potential; I<sub>b</sub>: Backward peak current density. The data were obtained from Figure 3B and C.

**Table S4.** EOR performances of Pd-Se NPs and various Pd-based electrocatalysts from published works.

| Catalyst                                         | Electrolyte                  | Mass Activity<br>(A mg <sub>Pd</sub> <sup>-1</sup> ) | Specific Activity<br>(mA cm <sup>-2</sup> ) | rate<br>(mV s <sup>-1</sup> ) | Ref.      |
|--------------------------------------------------|------------------------------|------------------------------------------------------|---------------------------------------------|-------------------------------|-----------|
| PdSe <sub>2</sub> NPs/C                          | 1.0 M KOH +<br>1.0 M ethanol | 7.2                                                  | 29.4                                        | 50                            | This work |
| Pd <sub>17</sub> Se <sub>15</sub> NPs/C          | 1.0 M KOH +<br>1.0 M ethanol | 5.2                                                  | 17.1                                        | 50                            | This work |
| Pd <sub>7</sub> Se <sub>2</sub> NPs/C            | 1.0 M KOH +<br>1.0 M ethanol | 4.8                                                  | 15.4                                        | 50                            | This work |
| Pd aerogel                                       | 1.0 M KOH +<br>1.0 M ethanol | 7.83                                                 | \                                           | 50                            | Ref. 1    |
| PdRu-NiZn<br>oxyphosphide                        | 1.0 M KOH +<br>1.0 M ethanol | 4.72                                                 | 12.3                                        | 50                            | Ref. 2    |
| Pd@Pt <sub>3</sub> Ni                            | 1.0 M KOH +<br>1.0 M ethanol | 5.78                                                 | 13.61                                       | 50                            | Ref. 3    |
| Pd <sub>7</sub> Ru <sub>1</sub><br>nanodendrites | 1.0 M KOH +<br>1.0 M ethanol | 1.15                                                 | ~7                                          | 50                            | Ref. 4    |
| PdCuCo alloy                                     | 1.0 M NaOH<br>+1.0 M ethanol | 3.95                                                 | 7.0                                         | 50                            | Ref. 5    |
| Pd nanocages<br>with Bi doping                   | 1.0 M KOH +<br>1.0 M ethanol | 3.49                                                 | 10.37                                       | 50                            | Ref. 6    |
| PdIn                                             | 1.0 M KOH +<br>1.0 M ethanol | 2.82                                                 | \                                           | 50                            | Ref. 7    |
| <i>c</i> -Pd-Ni-P@<br><i>a</i> -Pd-Ni-P          | 1.0 M KOH +<br>1.0 M ethanol | 3.05                                                 | ~11                                         | 50                            | Ref. 8    |
| PdAg<br>nanowires                                | 1.0 M KOH +<br>1.0 M ethanol | 2.84                                                 | 11.2                                        | 50                            | Ref. 9    |
| Au@Pd                                            | 1.0 M KOH +<br>1.0 M ethanol | 2.92                                                 | \                                           | 50                            | Ref. 10   |
| Pd/B,N-codope<br>graphene                        | 1.0 M NaOH<br>+1.0 M ethanol | 2.156                                                | \                                           | 50                            | Ref. 11   |
| Pd-Ni-P                                          | 1.0 M NaOH<br>+1.0 M ethanol | 4.945                                                | \                                           | 50                            | Ref. 12   |

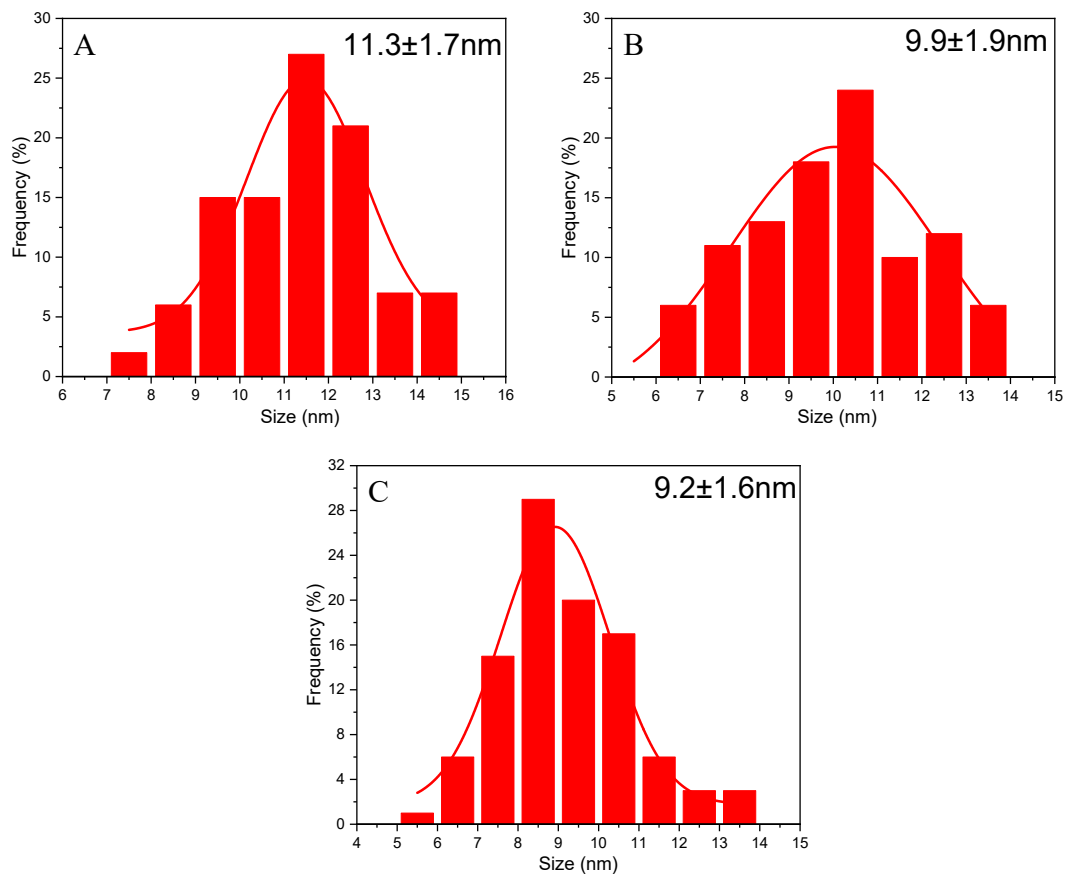

**Fig. S1** The Particle Size Histograms of PdSe<sub>2</sub> NPs (A), Pd<sub>17</sub>Se<sub>15</sub> NPs (B) and Pd<sub>7</sub>Se<sub>2</sub> NPs (C), respectively.



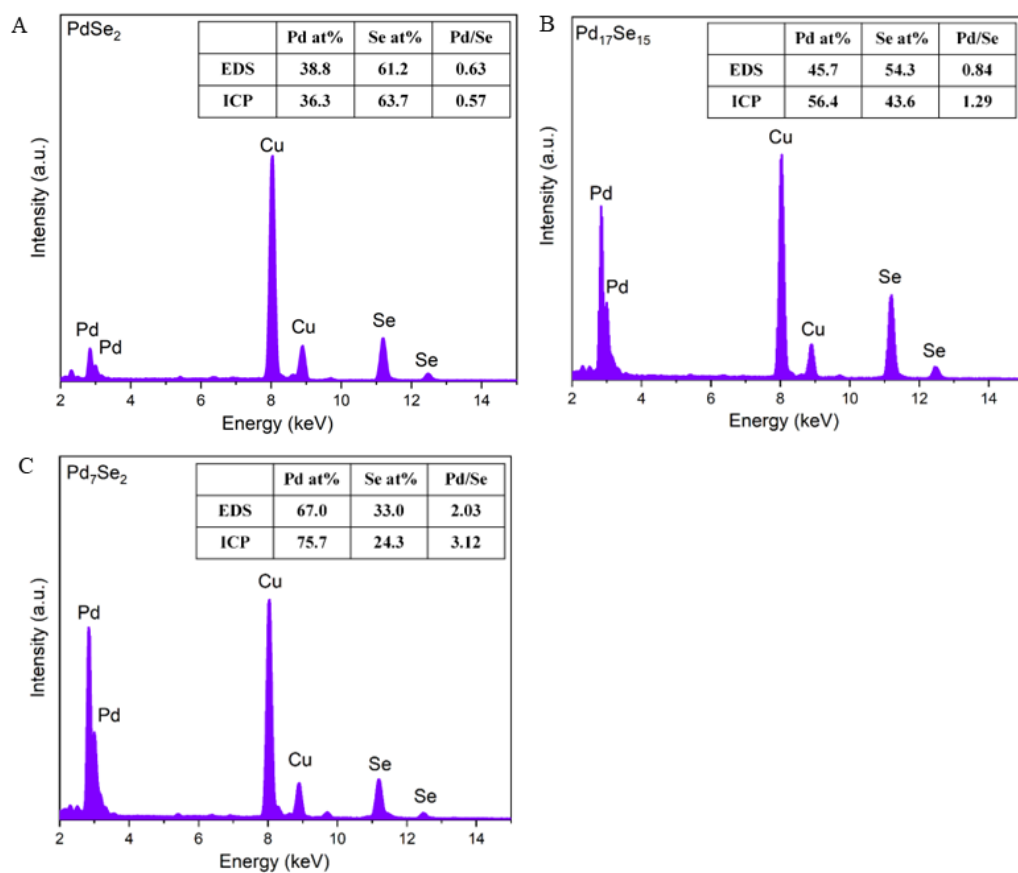

**Fig. S2** EDX spectra of the as-prepared PdSe<sub>2</sub> NPs (A), Pd<sub>17</sub>Se<sub>15</sub> NPs (B) and Pd<sub>7</sub>Se<sub>2</sub> NPs (C).

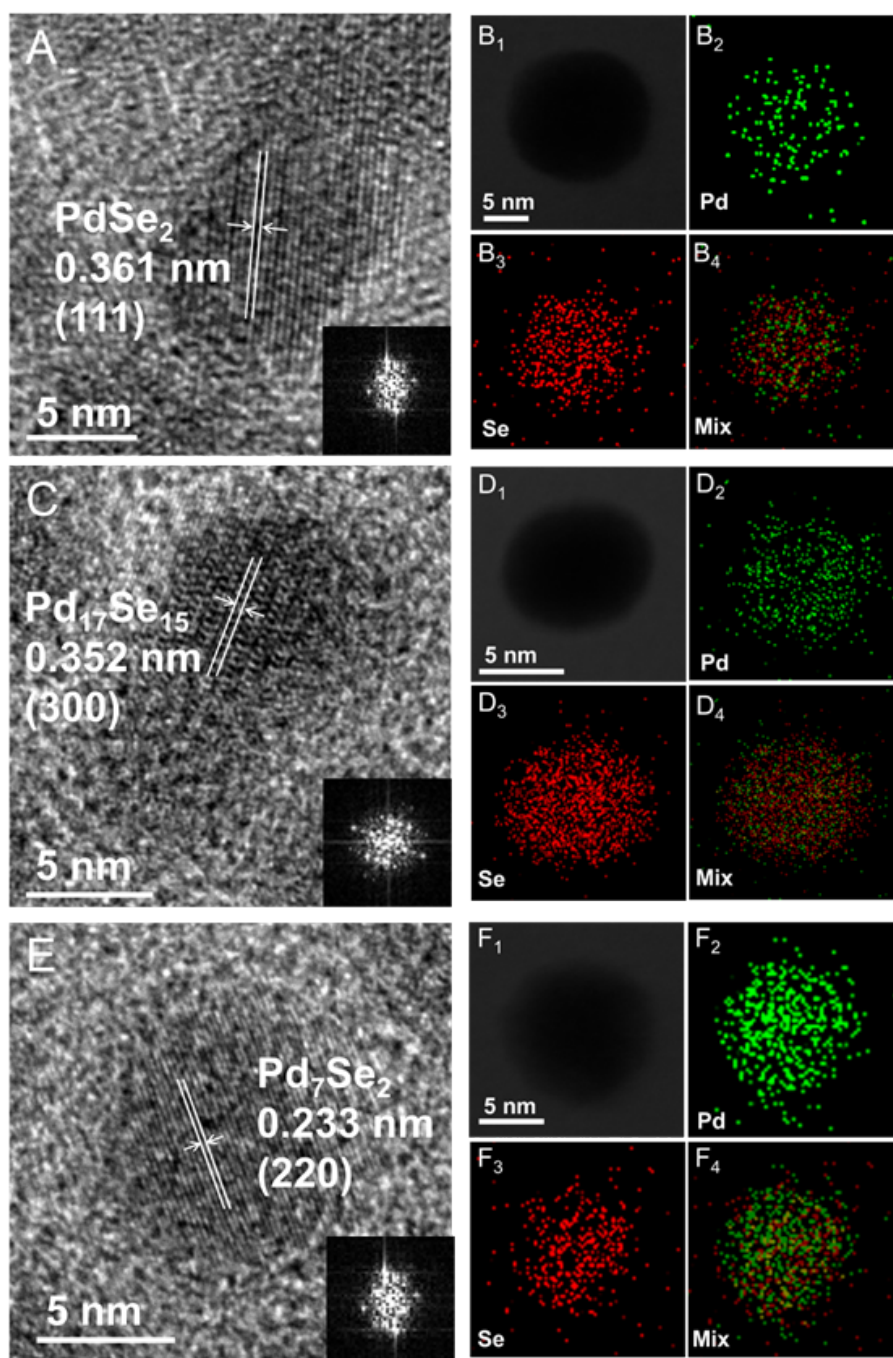

**Fig. S3** HRTEM images of the PdSe<sub>2</sub> NPs (A), Pd<sub>17</sub>Se<sub>15</sub> NPs (C) and Pd<sub>7</sub>Se<sub>2</sub> NPs (E), respectively, and the inserts of A, C, and E show the corresponding Fast Fourier Transform (FTT); STEM and corresponding element maps of the PdSe<sub>2</sub> NPs (B), Pd<sub>17</sub>Se<sub>15</sub> NPs (D) and Pd<sub>7</sub>Se<sub>2</sub> NPs (F), respectively.

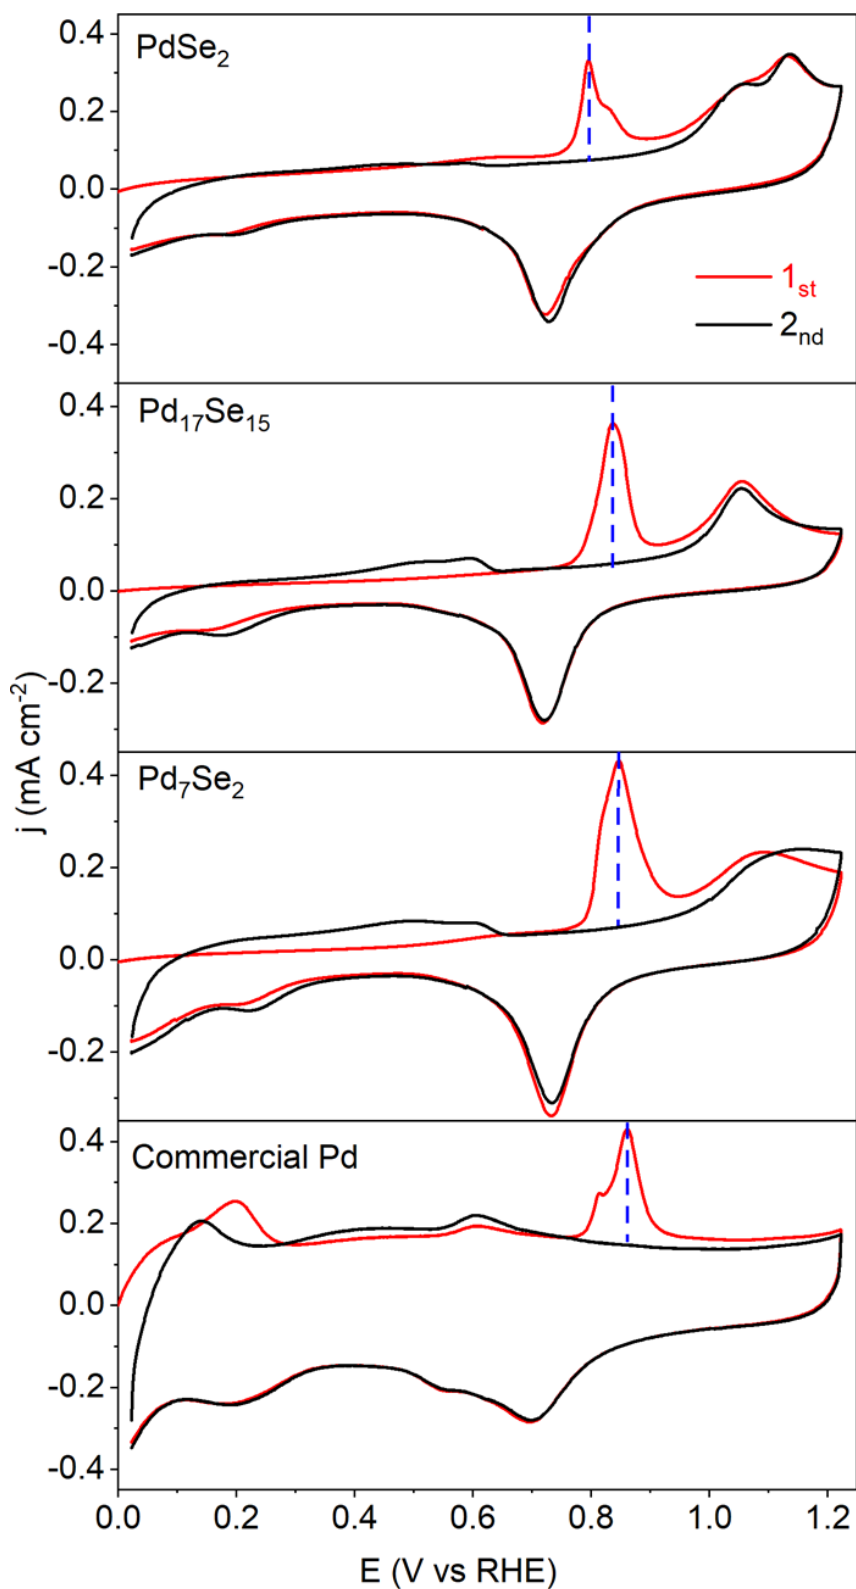

**Fig. S4** CO stripping curves over  $\text{PdSe}_2$ ,  $\text{Pd}_{17}\text{Se}_{15}$ ,  $\text{Pd}_7\text{Se}_2$ , and commercial Pd/C catalyst at a scan rate of  $50 \text{ mV s}^{-1}$  in 1 M KOH solution.

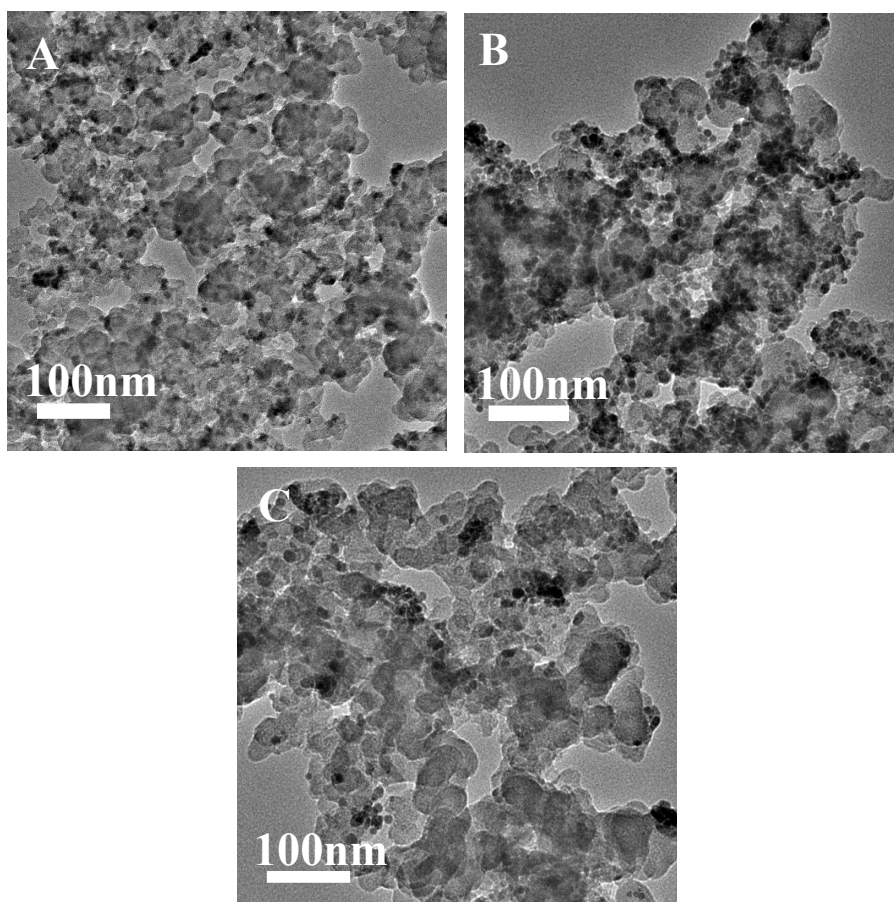

**Fig. S5** TEM images of the carbon-supported PdSe<sub>2</sub> (A), Pd<sub>17</sub>Se<sub>15</sub> (B) and Pd<sub>7</sub>Se<sub>2</sub> NPs (C).

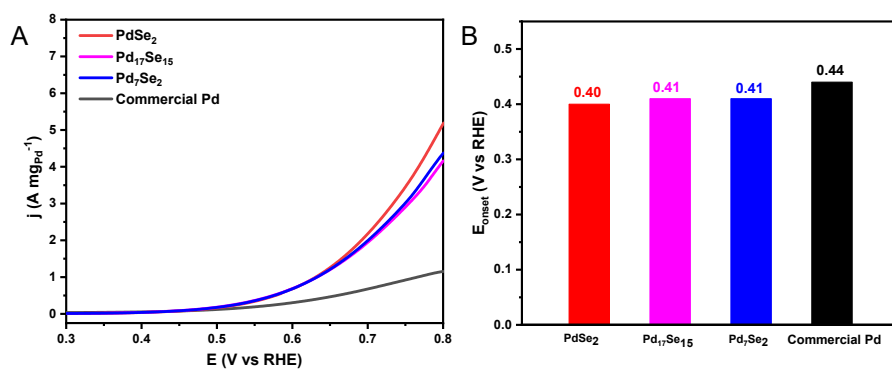

**Fig. S6** (A) The local magnified CV curves from 0.3-0.8 V vs RHE in 1 M KOH containing 1 M C<sub>2</sub>H<sub>5</sub>OH; (B) comparison of onset potentials for PdSe<sub>2</sub>, Pd<sub>17</sub>Se<sub>15</sub>, Pd<sub>7</sub>Se<sub>2</sub>, and commercial Pd/C catalyst.

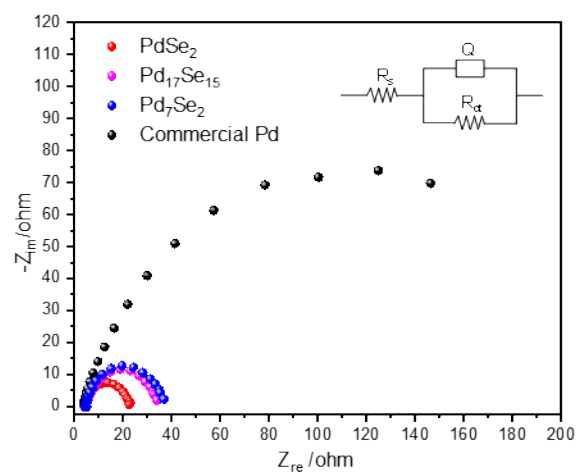

**Fig. S7** Nyquist plots of PdSe<sub>2</sub>, Pd<sub>17</sub>Se<sub>15</sub>, Pd<sub>7</sub>Se<sub>2</sub> and commercial Pd catalyst for the ethanol oxidation in 1 M KOH solution containing 1 M ethanol.

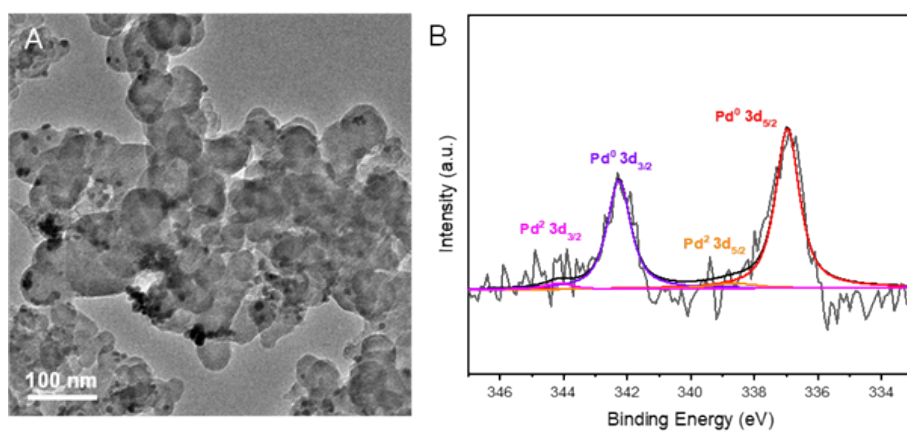

**Fig. S8** (A) TEM image of the carbon-supported PdSe<sub>2</sub> after the chronoamperometry test; (B) the Pd 3d XPS spectra of the PdSe<sub>2</sub> NPs after the chronoamperometry test.

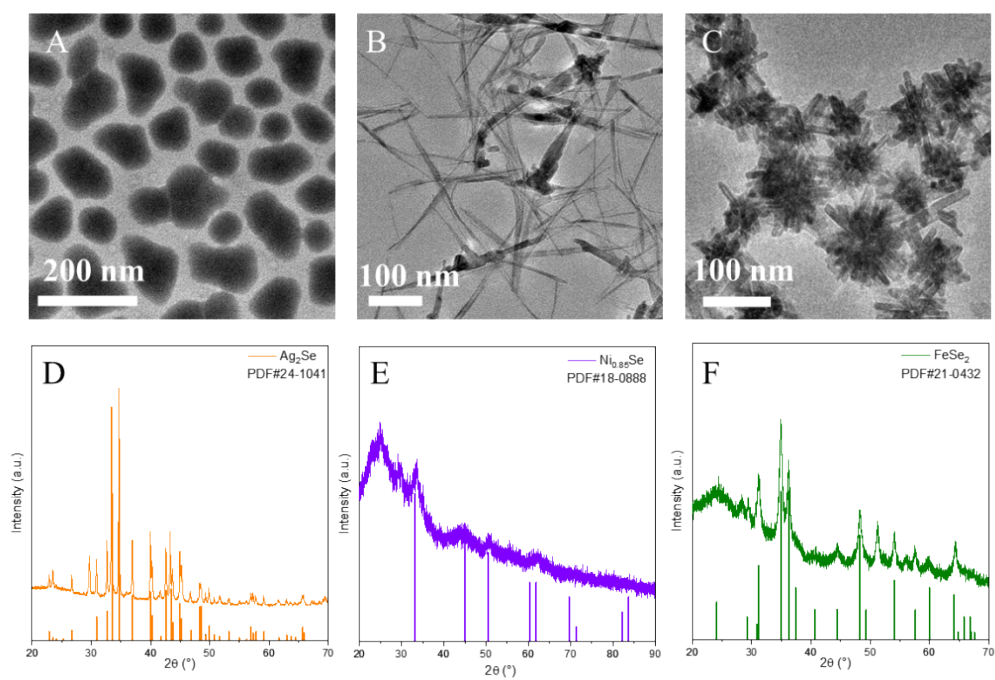

**Fig. S9** (A–C) TEM images and (D–F) XRD patterns of the Ag<sub>2</sub>Se NPs (A,D), Ni<sub>0.85</sub>Se NPs (B,E) and FeSe<sub>2</sub> NPs (C,F), respectively.



## ESI Reference

1. W. Liu, A.-K. Herrmann, D. Geiger, L. Borchardt, F. Simon, S. Kaskel, N. Gaponik and A. Eychmüller, *Angew. Chem. Int. Ed.*, 2012, **51**, 5743.
2. H. Xu, P. Song, Y. Zhang and Y. Du, *Nanoscale*, 2018, **10**, 12605.
3. Y. Wang, W. Wang, F. Xue, Y. Cheng, K. Liu, Q. Zhang, M. Liu and S. Xie, *Chem. Commun.*, 2018, **54**, 5185.
4. K. Zhang, D. Bin, B. Yang, C. Wang, F. Ren and Y. Du, *Nanoscale*, 2015, **7**, 12445.
5. Y. Shu, X. Shi, Y. Ji, Y. Wen, X. Guo, Y. Ying, Y. Wu, and H. Yang, *ACS Appl. Mater. Interfaces*, 2018, **10**, 4743.
6. X. Li, H. You, C. Wang, D. Liu, R. Yu, S. Guo, Y. Wang and Y. Du, *J. Colloid Interf. Sci.*, 2021, **591**, 203.
7. Y.-J. Chen, Y.-R. Chen, C.-H. Chiang, K.-L. Tung, T.-K. Yeh and H.-Y. Tuan, *Nanoscale*, 2019, **11**, 3336.
8. P.-F. Yin, M. Zhou, J. Chen, C. Tan, G. Liu, Q. Ma, Q. Yun, X. Zhang, H. Cheng, Q. Lu, B. Chen, Y. Chen, Z. Zhang, J. Huang, D. Hu, J. Wang, Q. Liu, Z. Luo, Z. Liu, Y. Ge, X.-J. Wu, X.-W. Du and H. Zhang, *Adv. Mater.*, 2020, **32**, 2000482.
9. H. Lv, Y. Wang, A. Lopes, D. Xu and B. Liu, *Appl. Catal. B: Environ.*, 2019, **249**, 116.
10. Y. Chen, Z. Fan, Z. Luo, X. Liu, Z. Lai, B. Li, Y. Zong, L. Gu and H. Zhang, *Adv. Mater.*, 2017, **29**, 1701331.
11. Q. Liu, J. Fan, Y. Min, T. Wu, Y. Lin and Q. Xu, *J. Mater. Chem. A*, 2016, **4**, 4929.
12. L. Chen, L. Lu, H. Zhu, Y. Chen, Y. Huang, Y. Li and L. Wang, *Nat. Commun.*, 2017, **8**, 14136.
